1 A non-canonical Hippo pathway regulates spindle disassembly and cytokinesis during meiosis in  
2 *Saccharomyces cerevisiae*

3 Scott M. Paulissen<sup>\*</sup>,<sup>1</sup>, Cindy A. Hunt<sup>\*</sup>, Christian J. Slubowski<sup>\*,2</sup>, Yao Yu<sup>†,3</sup>, Dang Truong<sup>\*</sup>,  
4 <sup>4</sup>, Xheni Mucelli<sup>\*</sup>, Hung T. Nguyen<sup>\*,5</sup>, Shayla Newman-Toledo<sup>\*</sup>, Aaron M. Neiman<sup>†</sup>, and  
5 Linda S. Huang<sup>\*</sup>

6

7 <sup>\*</sup>Department of Biology, University of Massachusetts Boston, Boston, Massachusetts 02125

8 <sup>†</sup>Department of Biochemistry and Cell Biology, Stony Brook University, Stony Brook, New  
9 York 11794

10 Present affiliation:

11 <sup>1</sup>National Institute of Child Health and Human Development, National Institutes of Health,  
12 Bethesda, MD 20892, [scott.paulissen@nih.gov](mailto:scott.paulissen@nih.gov)

13 <sup>2</sup>LakePharma, Inc., Hopkinton, MA 01748, [Christian.Slubowski@LakePharma.com](mailto:Christian.Slubowski@LakePharma.com)

14 <sup>3</sup>State Key Laboratory of Genetic Engineering, School of Life Science, Fudan University,  
15 Shanghai, China 200438, [yaoyu@fudan.edu.cn](mailto:yaoyu@fudan.edu.cn)

16 <sup>4</sup>Department of Chemistry, University of Massachusetts Lowell, Lowell, MA 01854,  
17 [Dang\\_Truong@uml.edu](mailto:Dang_Truong@uml.edu)

18 <sup>5</sup>Boston University, Boston, MA 02215, [nthung@bu.edu](mailto:nthung@bu.edu)

19 **Running title:** Control of meiotic exit

20 **Keywords:** sporulation, gametogenesis, STE20 family-GCKIII kinase, meiosis, cell cycle

21 control

22 **Corresponding author:** Linda S. Huang

23 Department of Biology, University of Massachusetts Boston, 100 Morrissey Boulevard, Boston,

24 MA 02125

25 [linda.huang@umb.edu](mailto:linda.huang@umb.edu)

26 617-287-6674

27  
28  
29  
30  
31  
32  
33  
34  
35  
36  
37  
38  
39  
40  
41  
42

## ABSTRACT

Meiosis in the budding yeast *Saccharomyces cerevisiae* is used to create haploid yeast spores from a diploid mother cell. During meiosis II, cytokinesis occurs by closure of the prospore membrane, a membrane that initiates at the spindle pole body and grows to surround each of the haploid meiotic products. Timely prospore membrane closure requires *SPS1*, which encodes a STE20-family GCKIII kinase. To identify genes that may activate *SPS1*, we utilized a histone phosphorylation defect of *sps1* mutants to screen for genes with a similar phenotype and found that *cdc15* shared this phenotype. *CDC15* encodes a Hippo-like kinase that is part of the mitotic exit network. We find that Sps1 complexes with Cdc15, that Sps1 phosphorylation requires Cdc15, and that *CDC15* is also required for timely prospore membrane closure. We also find that *SPS1*, like *CDC15*, is required for meiosis II spindle disassembly and sustained anaphase II release of Cdc14 in meiosis. However, the NDR-kinase complex encoded by *DBF2/DBF20* *MOB1* which functions downstream of *CDC15* in mitotic cells, does not appear to play a role in spindle disassembly, timely prospore membrane closure, or sustained anaphase II Cdc14 release. Taken together, our results suggest that the mitotic exit network is rewired for exit from meiosis II, such that *SPS1* replaces the NDR-kinase complex downstream of *CDC15*.

43

## INTRODUCTION

44

45

46

47

48

Sexual reproduction requires meiosis for the production of haploid gametes from a diploid precursor cell. The events of meiosis such as spindle disassembly and cytokinesis must be properly coordinated with each other, and with the developmental events that occur during gametogenesis. A better understanding of how these events are coordinated is important for understanding gamete formation.

49

50

51

52

53

54

55

56

57

58

In the budding yeast *Saccharomyces cerevisiae*, the haploid gametes are spores, which form when diploid cells encounter starvation conditions where nitrogen and carbon are limiting (reviewed in Neiman 2011). During sporulation, the diploid mother cell remodels its interior to form four haploid spores. Spore morphogenesis begins with the formation of a prospore membrane that grows from the spindle pole body. The prospore membranes grow around the haploid nuclei and fuse to close at the side of the nucleus away from the spindle pole body, resulting in the capture of each nucleus within its own membrane (Diamond *et al.* 2009). A protein complex known as the Leading Edge Protein complex is at the growing edge of the prospore membrane and includes Ssp1, Ady3, Irc10, and Don1 (Knop and Strasser 2000; Moreno-Borchart *et al.* 2001; Nickas and Neiman 2002; Maier *et al.* 2007; Lam *et al.* 2014).

59

60

61

62

63

64

Prospore membrane closure is the cytokinetic event in meiosis, and involves the removal of the Leading Edge Protein complex (Maier *et al.* 2007). Proper timing of prospore membrane closure requires *SPS1*, which encodes a STE20-family GCKIII kinase; cells lacking *SPS1* produce hyperelongated prospore membranes that close later than those in wild-type cells (Slubowski *et al.* 2014; Paulissen *et al.* 2016). Prospore membrane closure must be properly coordinated with other meiosis II events, such as spindle disassembly.



65           Compared to meiosis, exit from mitosis, which involves the downregulation of CDK  
66 activity and the coordination of spindle disassembly and cytokinesis, has been more extensively  
67 studied. Mitotic exit involves the activation of the Tem1-GTPase at the spindle pole body as it  
68 moves into the newly formed bud, leading to the activation of the Cdc15 Hippo-like kinase (Mah  
69 *et al.* 2001; Visintin and Amon 2001; D'Aquino *et al.* 2005; Pereira and Schiebel 2005;  
70 Maekawa *et al.* 2007; Chan and Amon 2010; Rock and Amon 2011; Bertazzi *et al.* 2011; Falk *et*  
71 *al.* 2016). Cdc15 phosphorylates the spindle pole body localized Nud1 scaffold, which leads to  
72 the recruitment and activation of the NDR kinase complex, Dbf2-Mob1 (Gruneberg *et al.* 2000;  
73 Luca *et al.* 2001; Rock and Amon 2013). A decrease in mitotic cyclin dependent kinase (CDK)  
74 activity is also required for Cdc15 and Mob1 activation (Campbell *et al.* 2019). Activation of the  
75 NDR kinase complex promotes the sustained release of the Cdc14 serine-threonine phosphatase  
76 from the nucleolus to inactivate mitotic CDK activity and promote exit from mitosis (Visintin *et*  
77 *al.* 1998; Shou *et al.* 1999; Mohl *et al.* 2009; Manzoni *et al.* 2010). These components are part of  
78 the Mitotic Exit Network (MEN) (reviewed in Bardin and Amon 2001; Stegmeier and Amon  
79 2004; Hergovich and Hemmings 2012; Weiss, 2012; Juanes and Piatti 2016).

80           Meiotic exit has been shown to utilize some but not all of the MEN components. Exit  
81 from meiosis I does not require the MEN (Kamieniecki *et al.* 2005; Pablo-Hernando *et al.* 2007;  
82 Attner and Amon, 2012), which instead acts to coordinate exit from meiosis II. *CDC15* plays a  
83 role in meiosis II spindle disassembly (Pablo-Hernando *et al.* 2007; Attner and Amon 2012) and  
84 is also required to maintain nuclear and nucleolar release of Cdc14 in meiosis II (Pablo-  
85 Hernando *et al.* 2007). Furthermore, a prospore membrane closure (Diamond *et al.* 2009) and  
86 morphology (Pablo-Hernando *et al.* 2007) defect have been described for *cdc15*. However, the  
87 upstream MEN component *TEM1* does not appear to play a role in Cdc15 activation, as the

88 Tem1-GTPase is not seen at the spindle pole body in meiosis (Attner and Amon 2012) and  
89 Tem1-depleted cells complete meiosis with similar efficiencies as wild-type cells (Kamieniecki  
90 *et al.* 2005). The spindle pole body located scaffold encoded by *NUD1* is also likely not involved  
91 in exit from meiosis, as *nud1* temperature sensitive alleles do not disrupt meiosis (Gordon *et al.*  
92 2006) and *NUD1* is not required for Dbf20 kinase activity in meiosis (Attner and Amon 2012).

93 In meiosis, the NDR-kinase complex utilizes the Mob1 regulatory subunit along with  
94 either of the paralogous Dbf20 and Dbf2 NDR kinases (Attner and Amon 2012; Renicke *et al.*  
95 2017). *MOB1* plays a role in meiosis II, as *mob1* cells progress through meiosis I with wild type  
96 kinetics, but show a delay in exit from meiosis II (Attner and Amon, 2012). Dbf20 kinase is  
97 active in meiosis II, and its kinase activity as well as its interaction with the Mob1 regulatory  
98 subunit is dependent on *CDC15* in meiosis II, although deletion of *DBF20* did not show a delay  
99 in meiosis II exit (Attner and Amon 2012). The major phenotype seen for cells lacking the NDR  
100 kinases complex in meiosis is a defect in spore number control (Renicke *et al.* 2017); spore  
101 number control is a process that involves the selection of nuclei associated with younger spindle  
102 pole bodies over older spindle pole bodies for spore packaging when available energy resources  
103 are a low (Davidow *et al.* 1980; Nickas *et al.* 2004; Taxis *et al.* 2005). Nud1 is also involved in  
104 spore number control (Gordon *et al.* 2006; Renicke *et al.*, 2017).

105 Here, we examine timely prospore membrane closure, meiosis II spindle disassembly and  
106 Cdc14 sustained release in anaphase II and find that *CDC15* and *SPS1* act together to regulate  
107 exit from meiosis II. However, the NDR kinase complex encoded by *DBF2 DBF20 MOB1* does  
108 not seem to be involved in these events. Instead, *DBF2 DBF20 MOB1* are important for spore  
109 number control, as previously demonstrated (Renicke *et al.* 2017). Likewise, we find that

110 *CDC15* and *SPS1* are not involved in controlling spore number and appear to act separately from  
111 the NDR kinase complex in meiosis II.

## 112 MATERIALS AND METHODS

### 113 Yeast strains, growth and sporulation

114 All strains used in this study are in the SK1 background (Kane and Roth 1974) and are  
115 described in Supplemental Material Tables S1 and S2. All strains are derived from LH177  
116 (Huang *et al.* 2005) except for YS429 (see below), the previously published strains (AN117-4B,  
117 A20239, A22416, and HI50), and the published strains used for screening (see below and  
118 Supplemental Table 1 and 3); alleles from these strains were crossed into the LH177 derived  
119 SK1 strain background. Standard genetic methods were used to create and propagate strains  
120 unless otherwise noted (Rose and Fink 1990). Epitope-tagged strains and knock out alleles were  
121 created using PCR-mediated recombination methods, as previously described (Longtine *et al.*  
122 1998; Lee *et al.* 2013; Slubowski *et al.* 2015).

123 YS429 was constructed by replacing the native *DBF2* promoter with the *CLB2* promoter  
124 by PCR mediated integration using pRK67 (Kaminiecki *et al.* 2005) as a template in strain  
125 AN117-4B (Neiman *et al.* 2000). The resulting haploid was crossed to a *dbf20Δ::kanMX6*  
126 haploid from the yeast knockout collection (Rabitsch *et al.* 2001) and segregants from this cross  
127 were mated to create YS429. The *CDC15-9MYC* allele in LH1070 and LH1071 was from  
128 A22416 (Attner *et al.* 2012). The *mob1-mn (KanMX6:pCLB2-3HA-MOB1)* allele used in this  
129 study is from A20239 (Attner *et al.* 2012). The *cdc15-mn (mxKAN:prCLB2:HA:CDC15)* allele  
130 used in this study is from HI50 (Pablo-Hernando *et al.* 2007).

131 Unless otherwise noted, cells were grown in standard yeast media and sporulated in a  
132 synchronous manner in liquid media, as previously described (Huang *et al.* 2005). In brief, liquid  
133 cultures were grown with agitation at 30°C. Cells to be sporulated were first grown to saturation  
134 in YPD overnight at 30° and then transferred to YPA and grown to ~1.5 OD<sub>600</sub>/ml overnight.

135 These cells were then harvested, washed in double-distilled H<sub>2</sub>O (ddH<sub>2</sub>O), and resuspended in 1%  
136 potassium acetate (KOAc) at an OD<sub>600</sub>/ml of 2.0. Sporulation of cells containing plasmids was  
137 the same as above except instead of YPD, cells were grown in synthetic dextrose (SD) media,  
138 lacking the appropriate nutrient for selection.

### 139 **Plasmids**

140 The plasmid pRS426-E20 was created by PCR amplification of GFP<sub>Envy</sub> from pFA6a-  
141 link- GFP<sub>Envy</sub> -SpHIS5 (Slubowski *et al.* 2015) using primers OLH1669  
142 (GTGTggatccATGTCTAAAGGCGAGGAATTG) and OLH1679  
143 (GTGTgaattcTTTGTACAATTCGTCCATTCCTAA), which incorporated the *Bam*HI and *Eco*RI  
144 restriction sites flanking GFP<sub>Envy</sub>. The amplified fragment was then digested with *Eco*RI and  
145 *Bam*HI. pRS426-G20 (Nakanishi *et al.* 2004) was also digested with *Eco*RI and *Bam*HI,  
146 removing the GFP from in front of the *SPO20* fragment on that plasmid. The resulting linearized  
147 backbone was then ligated to the GFP<sub>Envy</sub> PCR fragment. The resulting plasmid was verified by  
148 sequencing.

### 149 **Screening for H4S1p phenotype**

150 To screen for a H4S1p phenotype, mutant strains were inoculated in 20 ml YPD and  
151 grown overnight. Cultures were then diluted 1:100 into 80 ml YPA, such that the OD<sub>600</sub> was  
152 between 0.1-0.2, and grown overnight to reach an OD<sub>600</sub> between 1.0-1.2. Cells were then  
153 collected, washed in ddH<sub>2</sub>O, and resuspended in 50 ml of 2% KOAc at an OD<sub>600</sub> of 1.2 (~2x10<sup>7</sup>  
154 cells/ml). 10 mls of cells were collected at 0, 8, 10, and 24 hours after induction of sporulation.

155 Proteins were extracted by resuspending cells in Breaking Buffer (50 mM Tris-HCL pH7.5, 10%  
156 glycerol, 1 mM EDTA, 10mM MgCl<sub>2</sub>, 100mM NaCl, 1 mM DTT) with protease inhibitors (1  
157 mM PMSF, 1 µg/ml leupeptin, and 1 µg/ml peptastin A) and phosphatase inhibitors (100 mM  
158 NaF, 100 mM Na<sub>4</sub>P<sub>2</sub>O<sub>7</sub>, 10 mM Na<sub>3</sub>VO<sub>4</sub>). Cells were lysed using glass beads and a bead-beater.  
159 Protein concentration of extracts was determined using the Bio Rad Protein Assay, and extracts  
160 were adjusted to similar concentrations. Loading buffer was added to extract, which were then  
161 boiled and loaded onto an SDS-PAGE gel and immunoblotted. H4S1p was detected using a  
162 rabbit anti-phospho H4/H2A S1p antibody (07-179; Upstate/Merck-Millipore) at a dilution of  
163 1:4000, detected using HRP-conjugated secondary antibodies and ECL reagents (Amersham/GE  
164 Healthcare), and exposed to X-ray film.

#### 165 **Immunoblotting**

166 For all immunoblotting experiments other than those performed for the H4S1p screening,  
167 cells were collected at the indicated times and prepared using the TCA precipitation method  
168 (Philips and Herskowitz 1998), which involves first lysing cells in a lysis buffer (1.85 N NaOH  
169 and 10% v/v β-mercaptoethanol) followed by precipitation of proteins with 50% (v/v)  
170 trichloroacetic acid (TCA). Precipitated protein lysates were then washed with ice-cold acetone  
171 and resuspended in 2× sample buffer neutralized with 5 µl of 1 M Tris base; samples were heated  
172 before loading. Protein lysates were separated on standard single percentage SDS-PAGE gels,  
173 except for the histone phosphorylation blot in Figure 1A, which was run on a Novex 10-20%  
174 Tricine gel (Invitrogen).

175 The separated protein extract was transferred onto Immobilon LF-PVDF membrane,  
176 blocked with LI-COR PBS block, and incubated with the appropriate primary antibodies. H4S1  
177 phosphorylation was detected using the anti-phospho histone H4/H2A S1p antibody at 1:1000

178 (Upstate/Merck-Millipore); sf-GFP-Sps1 was detected using JL-8 anti-GFP antibodies  
179 (Takara/Clontech) at 1:1000; Sps1-13 $xmyc$  and Cdc15-9 $xmyc$  were detected using 9E10 anti-  
180 myc antibodies (Covance) at 1:1000; Pgk1 was detected by using 22C5D8 anti-Pgk1 (Life  
181 Technologies) at 1:1000; Fluorescent infrared-dye-conjugated anti-mouse secondary antibodies  
182 were used at 1:10,000 (LI-COR). All membranes were imaged using an Odyssey Infrared  
183 Imaging System (LI-COR).

#### 184 **Immunoprecipitation**

185 Lysates for immunoprecipitation were prepared from 120 OD<sub>600</sub> of cells. Cell pellets  
186 were lysed in a MiniBeadBeater8 (Biospec) at 4°C with glass beads in IP buffer (300mM NaCl,  
187 5 mM EGTA (pH 8.0), 50 mM Tris (pH 7.4), and 0.5% Nonidet P-40) with added protease and  
188 phosphatase inhibitors as previously described (Huang *et al.* 2005).

189 Lysate was clarified with three spins at maximum speed in a tabletop microcentrifuge,  
190 and an aliquot was saved for examination by immunoblot; this aliquot was first TCA precipitated  
191 before loading onto an SDS-PAGE gel. For immunoprecipitation, clarified lysate was then added  
192 to 40 $\mu$ l of blocked agarose beads (ChromoTek) incubated on a nutator at 4°C for 30 minutes.  
193 Lysates incubated on a nutator at 4°C for two hours with 20 $\mu$ l of GFP-Trap beads (ChromoTek).  
194 GFP-Trap complexes were then washed four times in IP buffer and re-suspended in 2 $\times$  SDS-  
195 PAGE sample buffer, boiled for 5 minutes, clarified through centrifugation and then separated by  
196 SDS-PAGE.

#### 197 **Phos-tag analysis**

198 Phos-tag gels were made using Phos-tag acrylamide (WACO) at a final concentration of  
199 31.4  $\mu$ M Phos-tag and 50.6  $\mu$ M MnCl<sub>2</sub> in an otherwise standard 6% SDS-polyacrylamide gel, as

200 described in (Whinston *et al.* 2013). Samples were prepared as above and run at 80 V at 4°C  
201 before being transferred and imaged, as above.

## 202 **Microscopy**

203 Widefield Microscopy was performed using a 100x (NA 1.45) objective on a Zeiss  
204 Axioskop Mot2. Images were taken using an Orca-ER cooled CCD camera (Hamamatsu) using  
205 Openlab 4.04 (Perkin Elmer) or iVision (BioVision Technologies) for image acquisition.

206 Confocal Microscopy was performed using a 100x (NA 1.49) objective on a Zeiss LSM-880  
207 Confocal Microscope. Confocal images were acquired using Zeiss Zen-Black software. Images  
208 were cropped and merged using ImageJ and FIJI (Schneider *et al.* 2012; Schindelin *et al.*, 2012).

## 209 **Assaying prospore membrane closure, formation, and number**

210 Cells were assayed for prospore membrane closure and formation as previously described  
211 (Paulissen *et al.* 2016). For prospore membrane closure and formation, only cells in anaphase II  
212 (as determined by Htb2-mCherry) were counted. Cells were considered to have initiated  
213 prospore membranes if a single prospore membrane could be detected. Cells were considered to  
214 have closed their prospore membranes if a single rounded prospore membrane was detected  
215 within the ascus.

216 To assay the number of prospore membranes that form within the mother cell, cells were  
217 sporulated in 1% acetate and fixed using 4.5% methanol free formaldehyde. Only cells in  
218 anaphase II (as determined by Htb2-mCherry) were counted. Cells were counted on a Zeiss  
219 Axioskop Mot2 using a 100x (NA 1.45) objective. Strains were sporulated in triplicate; 100  
220 anaphase II cells were counted per culture, for a total of 300 cells per strain.

## 221 **Visualization of spindles by immunostaining**



222 Sporulating cells were harvested and fixed in 3.7% methanol-free formaldehyde for 15  
223 minutes, washed twice with ddH<sub>2</sub>O and then suspended in 1 ml of SP buffer (1M sorbitol 10mM  
224 pH7.8 PBS). These cells were then spheroplasted at 37°C after adding 20µl 20T zymolyase at 5  
225 mg/ml concentration and 1 µl β-mercaptoethanol; spheroplast formation was checked using a  
226 100x phase objective on a Zeiss AxioMot2. Spheroplasted cells were washed with 1 ml SP  
227 buffer and resuspended in 500 µl of fresh SP buffer. Spheroplasted cells were then adhered to  
228 polylysine coated slides, blocked with blocking buffer (1% BSA, 0.1% Triton in PBS) and then  
229 rinsed three times with PBS.

230 Tubulin was detected using monoclonal mouse 12G10 anti-Tub1 antibody at 1:1000  
231 concentration (Developmental Studies Hybridoma Bank). Cells were incubated with antibody for  
232 one hour, rinsed four times with PBS and then incubated with Cy2-conjugated donkey anti-  
233 mouse antibodies at 1:100 dilution for one hour (JacksonImmuno; Figure 2) or AlexaFluor 488  
234 conjugated Donkey anti-mouse at 1.25 mg/ml (JacksonImmuno; Figure 8). Stained cells were  
235 then washed three times with PBS, twice with ddH<sub>2</sub>O and then sealed in Vectashield mounting  
236 medium (Vector Labs).

### 237 **Statistical analysis**

238 Statistical comparisons were performed by 1-way ANOVA followed by Tukey HSD post  
239 hoc test. All tests were performed using JMP11 (SAS).

### 240 **Data availability**

241 The strains and plasmids created for this study are available upon request. Supplemental  
242 Figures and Tables are available at FigShare. The data necessary for confirming the conclusions  
243 of this article are present.

244  
245  
246  
247  
248  
249  
250  
251  
252  
253  
254  
255  
256  
257  
258  
259  
260  
261  
262  
263  
264  
265

## RESULTS

### ***CDC15* is required for Sps1 phosphorylation**

Phosphorylation of the Ser1 residue of Histone H4 is greatly increased during meiosis and Sps1 had previously been demonstrated to be important for this phosphorylation (Krishnamoorthy et al., 2006). To identify additional genes that may function with Sps1, we used a Western blot assay with a H4/H2A Serine1 phosphorylation (H4/H2A S1p)-specific antibody to initially screen through a few genes involved in sporulation (*ama1*, *cdc15*, *gip1*, *spo71*, *spo73*, *spo75*, *spo77*, and *ssp2*) for those that display an H4 phosphorylation defect similar to *sps1Δ* mutants. We then carried out a more unbiased screen, examining H4 phosphorylation in a subset of strains from a collection of mutants in genes that are upregulated in sporulation (Rabitsch et al. 2001). The 120 genes that were tested are listed in Supplemental Material Table S3.

*cdc15* and *spo77* were among the mutants identified in this screen that exhibited decreased histone phosphorylation similar to *sps1Δ* (Figure 1A). *SPO77* was isolated as a high copy suppressor of a hypomorphic allele of *sps1* and acts with *SPS1* in regulating timely prospore membrane closure (Paulissen et al. 2016). Because a link between *SPS1* and *CDC15* was not previously reported, we focused our studies on *CDC15*.

Since Sps1 is a phosphoprotein (Slubowski et al. 2014) and because *CDC15* encodes a Hippo-like protein kinase (Schweitzer and Philippsen, 1991; Rock et al. 2013), we asked whether *CDC15* was required for Sps1 phosphorylation. We examined Sps1 phosphorylation state in sporulating cells with depleted levels of Cdc15. Separation of Sps1 on an SDS-PAGE gel revealed that the doublet seen in wild type cells (Slubowski et al. 2014) collapses into the faster migrating band in the *cdc15-mn* strain (*cdc15-meiotic null*; *CDC15* under the control of the

266 mitotic *CLB2* promoter (Lee and Amon 2003; Pablo-Hernando *et al.* 2007)) (Figure 1B). This  
267 result suggested that post-translational modification of Sps1 protein was *CDC15* dependent.

268 To better examine the migration shifts due to post-translational phosphorylation, we used  
269 a Phos-tag polyacrylamide gel to resolve the Sps1 protein. Phos-tag gels specifically retard the  
270 migration of phosphorylated protein species through the gel (Kinoshita *et al.* 2006). Sps1 runs as  
271 multiple bands on a Phos-tag gel, consistent with it being a phosphoprotein (Figure 1C). This  
272 banding pattern was strikingly reduced in the *cdc15-mn* strain (Figure 1C), which supports the  
273 idea that *CDC15* is required for most, if not all, of the phosphorylation of Sps1.

274 To determine whether the phosphorylation of Sps1 by Cdc15 may be direct, we examined  
275 whether Cdc15 and Sps1 physically interact in sporulating cells by co-immunoprecipitation.  
276 Using protein lysates from a strain containing both *CDC15-13myc* and *sfGFP-SPS1*, we see  
277 Cdc15 and Sps1 in a complex (Figure 1D).

278 Because Cdc15 is a phosphoprotein (Jaspersen and Morgan 2000; Jones *et al.* 2011), we  
279 asked if post-translational modifications of Cdc15 were altered in *sps1Δ* mutants. SDS-PAGE  
280 analysis of Cdc15 in both wild-type and *sps1Δ* mutant cells both show a distinct doublet  
281 suggesting phosphorylation of Cdc15 is not altered in the *sps1Δ* mutant (Figure S1), consistent  
282 with *CDC15* acting upstream of *SPS1*. Taken together, these results show that *CDC15* is required  
283 for Sps1 phosphorylation and support a model in which Cdc15 is the upstream activating kinase  
284 of Sps1.

### 285 **Like *SPS1*, *CDC15* is required for timely prospore membrane closure**

286 Previous studies have demonstrated a role for *CDC15* in prospore membrane  
287 morphogenesis, with *cdc15* mutant cells forming aberrant prospore membrane morphologies  
288 (Pablo-Hernando *et al.* 2007) and having a defect in closing prospore membranes (Diamond, et

289 al. 2009). To visualize prospore membranes, we utilized GFP (either eGFP or GFP<sub>Envy</sub>, a bright  
290 and photostable GFP variant (Slubowski *et al.* 2015)) fused to the 40 amino acid prospore  
291 membrane-targeting region of the Spo20 protein (Nakanishi *et al.* 2004). We examined prospore  
292 membranes in live cells during sporulation in wild type, *sps1Δ* cells and *cdc15-mn* cells. Unlike  
293 wild type cells (Figure 2A), *cdc15-mn* cells show hyperelongated prospore membranes (Figure  
294 2B), similar to those seen in *sps1Δ* cells (Figure 2C), consistent with the previously described  
295 *cdc15* prospore membrane morphology (Pablo-Hernando *et al.* 2007) and closure defect  
296 (Diamond *et al.* 2009).

297 We asked whether *SPS1* and *CDC15* acted in the same or in a parallel pathway, to  
298 regulate prospore membrane closure. We created the *sps1Δ cdc15-mn* strain, and saw that the  
299 double mutant cells displayed a prospore membrane morphology defect that was no worse than  
300 that of the *sps1Δ* mutation alone (Figure 2C and 2D), consistent with both genes acting in the  
301 same pathway.

302 Because *SPS1* plays a role in timely prospore membrane closure (Paulissen *et al.* 2016),  
303 we asked whether *CDC15* affects the timing of prospore membrane closure. To assay prospore  
304 membrane closure, we examined the appearance of rounded prospore membranes, as rounded  
305 prospore membranes appear when the membrane closes (Diamond *et al.* 2009; Paulissen *et al.*  
306 2016). Cells with *cdc15-mn* exhibited both a delay in appearance of as well as a reduction in the  
307 accumulation of closed prospore membranes, forming rounded membranes at approximately  
308 72% (Figure 2C; Figures 3A), similar to the reduction seen in *sps1Δ* mutants and less than the  
309 95% seen in wild type cells (Figure 3A and Paulissen *et al.* 2016). The observed delay in  
310 prospore membrane closure is not due to a delay in prospore membrane initiation, as *cdc15-mn*  
311 cells showed a similar onset of prospore membrane biogenesis as wild type (Figure 3B), similar

312 to the lack of defect seen in prospore membrane initiation seen in *sps1Δ* mutants (Figure 3B,  
313 Paulissen *et al.* 2016).

314 *SPS1* acts to regulate timely prospore membrane closure in a pathway in parallel to  
315 *AMAI*, as cells lacking *SPS1* or *AMAI* have partial defects in prospore membrane closure that is  
316 exacerbated in the double mutant (Paulissen, et al. 2016). We tested whether *CDC15* also acts in  
317 parallel to *AMAI* and examined doubly mutant *cdc15-mn ama1Δ* cells. We found that *cdc15-mn*  
318 *ama1Δ* cells form rounded prospore membranes at < 0.5% frequency (Figure 3A), a much  
319 stronger defect than either *cdc15-mn* (Figure 3A) or *ama1Δ* cells alone (~30%; Diamond et al.  
320 2009; Paulissen et al. 2016). These *cdc15-mn ama1Δ* double mutant cells form prospore  
321 membranes that become highly invaginated, filling the cytoplasmic space of the mother cell and  
322 only rarely rounding up and closing (Figure 3C), similar to that seen in the *sps1Δ ama1Δ* double  
323 mutant (Paulissen *et al.* 2016). These results taken together show that *CDC15* regulates timely  
324 prospore membrane closure, acting in the same pathway as *SPS1* and in parallel to *AMAI*.

### 325 ***SPS1* has a meiosis II spindle disassembly defect similar to *CDC15***

326 Cells lacking *CDC15* have been previously shown to have a meiosis II spindle  
327 disassembly defect (Pablo-Hernando, *et al.* 2007; Attner and Amon 2012). Since *SPS1* and  
328 *CDC15* share prospore membrane phenotypes, we examined whether *SPS1* played a role in  
329 meiotic spindle disassembly.

330 We examined spindles in wild type, *sps1Δ* and *cdc15-mn* sporulating cells by  
331 immunostaining fixed sporulating cells. Spindles in wild type cells elongated and then  
332 disassembled during meiosis I and II, eventually forming small spindles in the newly created  
333 spores (Figure 4A). *cdc15-mn* cells failed to disassemble meiosis II spindles, with late anaphase

334 II spindles becoming extended and ultimately fragmenting within the cell (Figure 4B), consistent  
335 with previous observations (Pablo-Hernando *et al.* 2007; Attner and Amon 2012).

336 *sps1Δ* mutant cells had microtubule morphologies that were indistinguishable from that  
337 of the *cdc15-mn* mutant (Figure 4C), including the frequent occurrence of elongated, fragmented,  
338 and supernumerary microtubules late in anaphase II (Figure 4C). When we examine the meiotic  
339 spindles in the *sps1Δ cdc15-mn* double mutant, we see that the microtubule phenotype was  
340 indistinguishable to that of the single mutants (Figure 4D). These results are consistent with  
341 *SPS1* and *CDC15* acting in the same pathway for meiotic exit, which involves both meiotic  
342 spindle disassembly and cytokinesis, the latter accomplished via prospore membrane closure  
343 during yeast meiosis.

#### 344 **Cdc14 sustained release in anaphase II requires *SPS1***

345 During mitosis, the MEN, a signal transduction network that utilizes Cdc15 activation of  
346 Dbf2-Mob1 NDR kinase complex (Rock *et al.* 2013), will ultimately promote the release of the  
347 Cdc14 phosphatase from the nucleolus to inactivate mitotic CDK activity and promote exit from  
348 mitosis (Visintin *et al.* 1998; Shou *et al.* 1999; Mohl *et al.* 2009; Manzoni *et al.* 2010). In  
349 meiosis, MEN is thought to be predominately active in meiosis II, with Dbf20 as the major NDR  
350 kinase in meiosis, although Dbf2 also plays a role (Attner and Amon 2012; Renicke *et al.* 2017).

351 During meiosis, *CDC14* acts in both meiosis I and meiosis II (Buonomo *et al.* 2003;  
352 Marston *et al.* 2003; Kamieniecki *et al.* 2005; Villoria *et al.* 2016; Fox *et al.*, 2017). In meiosis,  
353 Cdc14 is released from the nucleolus before anaphase I spindle elongation, then reappears in the  
354 nucleolus at the start of meiosis II and is released again just before anaphase II (Bizzari and  
355 Marston 2011; Kerr *et al.* 2011); the initial release of Cdc14 in meiosis requires the FEAR  
356 network and not the MEN (Buonomo *et al.* 2003; Marston *et al.* 2003; Kamieniecki *et al.* 2005;

357 Pablo-Hernando *et al.* 2007). However, *CDC15* is required for the sustained release of Cdc14  
358 during anaphase II (Pablo-Hernando *et al.* 2007; Attner and Amon, 2012).

359 We first re-examined Cdc14 release during anaphase II in wild type cells, using a  
360 *CDC14- GFP<sub>Envy</sub>* allele. We see dynamic localization for Cdc14 (Figure 5), as previously  
361 described (Bizzari and Marston 2011), with Cdc14 being released from the nucleolus and into  
362 the nucleus and cytoplasm during anaphase II. We also see, as previously described (Pablo-  
363 Hernando *et al.* 2007), that Cdc14 release is not properly sustained in anaphase II in the *cdc15-*  
364 *mn* mutants.

365 Given the role of *CDC15*, we asked whether *SPS1* plays a role in Cdc14 anaphase II  
366 release. When we examined Cdc14 release from the nucleolus in *sps1Δ* cells during anaphase II,  
367 we see that Cdc14 release is not properly sustained, similar to that seen in *cdc15-mn* mutants  
368 (Figure 5). We confirmed localization of the Cdc14 to the nucleolus in *sps1Δ* and *cdc15-mn*  
369 mutants using the nucleolar marker Nop56/Sik1 (Gautier *et al.* 1997; Figure S2).

370 Because the Dbf2-Mob1 NDR kinase complex acts in between *CDC15* and *CDC14*  
371 during mitosis, we examined the role of NDR kinase complex in Cdc14 release in anaphase II.  
372 We created the *dbf2-mn* allele, which places the mitotically-required *DBF2* gene under the  
373 control of the mitosis-specific *CLB2* promoter. To eliminate as much NDR kinase complex  
374 activity in meiosis as possible, we combined the *dbf2-mn* allele with the previously constructed  
375 *mob1-mn* and the *dbf20Δ* alleles (Attner and Amon 2012). When we examined Cdc14 release in  
376 the *mob1-mn dbf2-mn dbf20Δ* triple mutant strain, we find that Cdc14 is properly released during  
377 anaphase II, similar to what is seen in wild type cells and in contrast to what is seen in the *cdc15*  
378 and *sps1* mutant cells (Figure 5). Thus, in meiosis II, the NDR kinase complex, encoded by  
379 *MOB1 DBF2 DBF20*, does not act downstream of *CDC15* to regulate Cdc14 release. Instead, our

380 results are consistent with *SPS1* acting downstream of *CDC15* to regulate Cdc14 sustained  
381 release during anaphase II.

### 382 ***CDC15* and *SPS1* do not act with the NDR kinase complex for spore number control**

383 The NDR kinase complex has been previously shown to play a role in spore number  
384 control, a process that determines the number of spores packaged during meiosis (Renicke *et al.*  
385 2017). Spore number control regulates the number of spindle pole bodies that are competent for  
386 prospore membrane growth; this process depends on a spindle pole body modification that  
387 happens based on the age of the spindle pole body and the nutrients available to sporulating cells  
388 (Davidow *et al.* 1980; Nickas *et al.* 2004; Taxis *et al.* 2005). Depletion of the NDR kinase  
389 complex results in fewer spores per ascus forming during sporulation, as seen when *MOB1*  
390 *DBF2 DBF20* activity was reduced using a protein depletion system (Renicke *et al.* 2017). We  
391 see a similar result using our *mob1-mn dbf2-mn dbf20Δ* strain, as assayed by counting refractile  
392 spores formed (Figure S3) or by counting the number of prospore membranes formed as a proxy  
393 for the number of spores than can form within the ascus (Figure 6).

394 Because neither *cdc15-mn* nor *sps1Δ* cells form refractile spores, we assayed spore  
395 number control by counting the number of prospore membranes that are present in anaphase II,  
396 to determine how many spores could form within an ascus. We see most *sps1Δ* and *cdc15-nm*  
397 mutant cells will initiate four prospore membranes per ascus, similar to that seen in wild type  
398 cells, and unlike that seen in the *mob1-mn dbf2-mn dbf20Δ* mutants. These results suggest that  
399 neither *sps1Δ* nor *cdc15-nm* act with the NDR kinase complex in spore number control.

400 **The NDR kinase complex does not play a role in timely prospore membrane closure or**  
401 **spindle disassembly**



402           Because we see that the Mob1-Dbf2/20 NDR kinase complex appears to regulate distinct  
403 biological processes from the Cdc15 and Sps1 kinases, we examined prospore membrane  
404 morphology and timing of prospore membrane closure in the *mob1-mn dbf2-mn dbf20Δ* triple  
405 mutant. When we examine prospore membrane morphology in the *mob1-mn dbf2-mn dbf20Δ*  
406 triple mutant, we do not see the characteristic hyperelongated prospore membranes seen in *sps1Δ*  
407 and *cdc15-nm* mutant cells, although aberrant prospore membrane size and nuclear capture  
408 defects were observed (Figure 7A). When we examined the timing of prospore membrane  
409 closure, we saw that the *mob1-mn dbf2-mn dbf20Δ* mutant cells produced rounded prospore  
410 membranes with similar timing as wild type cells and do not exhibit the delay seen in *cdc15-mn*  
411 or *sps1Δ* mutant cells (Figure 7A and Figure B); all cells examined initiate formation of prospore  
412 membranes at a similar time (Figure 7C).

413           Because we see a spindle disassembly defect in *sps1* and *cdc15-nm* mutant cells, we  
414 examined the spindle in the *mob1-mn dbf2-mn dbf20Δ* cells. *mob1-mn dbf2-mn dbf20Δ* triple  
415 mutant cells do not produce the elongated, fragmented, and supernumerary microtubules late in  
416 anaphase II that are seen in the *sps1Δ*, *cdc15-nm*, and *sps1Δ cdc15-nm* double mutant cells.  
417 Instead, in late meiosis II, spindles in the *mob1-mn dbf2-mn dbf20Δ* cells appear to be  
418 disassembled into shorter punctate pieces (Figure 8A), which is distinct from the fragmented  
419 microtubules seen in *sps1Δ*, *cdc15-nm*, and *sps1Δ cdc15-nm* late in anaphase II. Thus, the NDR  
420 kinase complex does not appear to play a role in timely prospore membrane closure or spindle  
421 disassembly.

422  
423

## DISCUSSION

424           Our studies demonstrate that during meiosis, timely prospore membrane closure, meiosis  
425 II spindle disassembly, and sustained release of Cdc14 at anaphase II are regulated by *SPS1* and  
426 *CDC15*, while the Mob1-Dbf2/20 complex plays a separate role in meiosis regulating spore  
427 number control. These results suggest that for exit from meiosis II, the MEN is rewired, such that  
428 Sps1 replaces the NDR kinase complex and acts downstream of the Cdc15 kinase.

### 429 ***SPS1* acts with *CDC15* to regulate exit from meiosis II**

430           We describe two previously unknown roles for *SPS1* in the completion of meiosis: timely  
431 spindle disassembly and Cdc14 sustained release. Prior to this study, the involvement of *SPS1* in  
432 sporulation was thought to be for spore morphogenesis (Friesen *et al.* 1994; Iwamoto *et al.* 2005)  
433 and more specifically, for timely prospore membrane closure (Paulissen *et al.* 2016).  
434 Furthermore, *sps1Δ* and *cdc15-mn* mutants have identical phenotypes, as we describe a role for  
435 *CDC15* in timely prospore membrane closure. Since we see that Cdc15 is needed for Sps1  
436 phosphorylation, these results are consistent with a model where Sps1 acting downstream of  
437 Cdc15 for exit from meiosis II (see model in Figure 8B).

438           A better understanding of the mechanism underlying how this pathway leads to the exit  
439 of meiosis II will require identification of downstream targets. In mitosis, although the  
440 phosphorylation of many CDK targets are reversed by Cdc14 upon mitotic exit, some  
441 downstream targets important for cytokinesis are directly phosphorylated by the Dbf2 kinase  
442 (Meitinger *et al.*, 2011, Oh *et al.*, 2012). For meiosis, it is unknown whether all targets  
443 downstream of *CDC15* and *SPS1* are directly regulated by the Cdc14 phosphatase, or whether  
444 Sps1 may directly phosphorylate downstream targets as well. It is likely that Sps1 plays some  
445 direct role, as previous studies have demonstrated that although *CDC15* is required for sustained

446 Cdc14 release, *CDC14* does not appear to play a role in meiosis II spindle disassembly or  
447 prospore membrane morphology (Pablo-Hernando et al. 2007; Arguello-Miranda et al. 2017).  
448 These studies depleted *CDC14* activity using a *cdc14-ΔNES* allele which deleted the Cdc14  
449 nuclear export signal at residues 359-367 (Pablo Hernando et al. 2007) or the *cdc14-3* ts allele  
450 (Arguello-Miranda et al., 2017). The role of *SPS1* in prospore membrane closure is likely to be  
451 *CDC14* independent, as *SPS1* is required for the phosphorylation and reduced stability of Ssp1  
452 (Paulissen et al. 2016), a protein localized to the leading edge of the growing prospore  
453 membrane that must be removed and degraded for this process to occur (Maier et al. 2007).

454 We find that *CDC15* and *SPS1* act in parallel to *AMAI*, which encodes a meiosis-specific  
455 activator of the anaphase promoting complex (APC/C) (Cooper et al. 2000). Previous studies  
456 have examined a hyperactive *ama1* allele (*ama1-m8*, which lacks eight consensus Cdc28  
457 phosphorylation sites in Amal) in combination with *cdc15-mn* and found a significant increase  
458 in prospore membrane closure in the double mutant (Diamond et al. 2009), consistent with our  
459 findings here. Interestingly, *AMAI* has also been linked to both spindle disassembly and prospore  
460 membrane closure. For meiosis II spindle disassembly, *AMAI* acts downstream of *HRR25*  
461 encoded casein kinase 1 (Arguello-Miranda et al. 2017). *AMAI* regulates prospore membrane  
462 closure (Diamond et al. 2009; Paulissen et al. 2016) and affects the stability of Ssp1, localized at  
463 the leading edge of the prospore membrane (Diamond et al. 2009). The combination of both  
464 meiosis II spindle disassembly and prospore membrane closure defects for *cdc15*, *sps1*, and  
465 *ama1* mutants raises the question of whether the prospore membrane closure defect seen in these  
466 mutants is a consequence of the stable meiosis II spindles, which are in the way and thus prevent  
467 the membrane fusion event required to close the membrane. Whether prospore membrane  
468 closure and spindle disassembly are coordinated by the regulation of a common target of both

469 these pathways, or, whether these two events are regulated via distinct targets remains to be  
470 determined.

### 471 **Cdc15 and the NDR/LATS kinase complex play distinct roles in meiosis**

472 In meiosis II, cells appear to utilize *CDC15* and *MOB1-DBF2/20* for distinct roles, unlike  
473 in mitosis where Cdc15 activates a conserved Mob1-NDR kinase signaling system, as seen in  
474 typical Hippo signaling (Hergovich and Hemmings, 2012, Weiss, 2012). In meiosis II, it appears  
475 that *MOB1-DBF2/20* is important for spore number control (Renicke et al., 2017), in which  
476 neither *CDC15* nor *SPS1* play a role, as assayed by the number of prospore membranes formed.

477 Previous work described a role for *CDC15* in spore number control, with *cdc15* depleted  
478 mutants forming more meiotic plaques on the spindle pole bodies when sporulated in low acetate  
479 conditions, compared to wild type cells and the *mob1 dbf2 dbf20* triple mutant (Renicke *et al.*  
480 2017). We do not see a difference between *cdc15-mn* and wild type cells in spore number control  
481 using a direct assay of counting the number of prospore membranes formed in 1% acetate  
482 (Figure 6). Under our sporulation conditions, it may not be possible to see the *CDC15* effect, as  
483 most wild type cells produce four prospore membranes (although we can see the effect of the  
484 NDR/LATS kinase complex on spore number control under these conditions (Figure S3)).  
485 Importantly, the previous study found that the *mob1 dbf2 dbf20* depleted triple mutant had a  
486 distinct phenotype from *cdc15* depleted mutants in spore number control (Renicke *et al.* 2017),  
487 consistent with our findings that Cdc15 and the NDR/LATS kinase complex play distinct roles in  
488 meiosis (Figure 8B).

489 Previous studies have shown that Dbf20 kinase activity depends on *CDC15* in meiosis II,  
490 and the interaction of Dbf20 and Mob1 is dependent on *CDC15* (Attner and Amon 2012).  
491 However, our phenotypic characterization is consistent with the exit from meiosis functions of

492 *CDC15* not requiring *DBF2/20-MOB1*. It is possible that there are some Dbf20-Mob1 functions  
493 in meiosis that require *CDC15* activity, as the kinase activity of Dbf20 and its interaction with  
494 Mob1 were demonstrated biochemically.

#### 495 **GCK kinase as an alternative member of the Hippo signaling pathway**

496 Sps1 is a STE20-family GCKIII kinase (Slubowski *et al.* 2014), and modifications of the  
497 typical Hippo signaling module to include STE20-family GCK kinases has been reported. For  
498 example, in fission yeast, Hippo signaling also involves in intervening GCK-family kinase, Sid1,  
499 that acts between the Cdc7 Hippo-like kinase and the Mob1/Sid2 NDR kinase for septation  
500 (referred to as the SIN pathway) (Guertin *et al.*, 2000). For tracheal morphogenesis in  
501 *Drosophila*, the NDR kinase Trc is activated by Germinal center kinase III, a GCKIII kinase,  
502 (Poon *et al.*, 2018). Unlike these previously described cases of GCK use that involve a  
503 downstream NDR/LATS kinase, for budding yeast meiosis, it appears that there has been a  
504 separation of function between the Hippo-GCKIII module and the downstream Mob1-Dbf2/20  
505 NDR/LATS kinase, providing a distinct example of how Hippo signaling can act with GCK  
506 members.

507

#### 508 **Acknowledgements**

509 We thank the Amon lab for strains, Yasuyuki Suda for assistance with strain construction, Matt  
510 Durant for comments on the manuscript, and Angelika Amon for comments on an earlier version  
511 of this work. This work was funded by grants from NIH to LSH (GM86805) and AMN  
512 (GM072540) and a Sanofi-Genzyme Fellowship to SMP.

513

## REFERENCES

- 514 Argüello-Miranda, O., I. Zagoriy, V. Mengoli, J. Rojas, K. Jonak *et al.*, 2017 Casein Kinase 1  
515 Coordinates Cohesin Cleavage, Gametogenesis, and Exit from M Phase in Meiosis II. *Dev. Cell*  
516 40: 37-52.  
517
- 518 Attner, M. A., and A. Amon, 2012 Control of the mitotic exit network during meiosis. *Mol. Biol.*  
519 *Cell* 23: 3122-3132.  
520
- 521 Bardin, A. J., and A. Amon, 2001 MEN and SIN: What's the difference? *Nat. Rev. Mol. Cell*  
522 *Biol.* 2: 815-826.  
523
- 524 Bertazzi, D. T., B. Kurtulmus, and G. Pereira, 2011 The cortical protein Lte1 promotes mitotic  
525 exit by inhibiting the spindle position checkpoint kinase Kin4. *J. Cell Biol.* 193: 1033–1048.  
526
- 527 Bizzari, F., and A. L. Marston, 2011 Cdc55 coordinates spindle assembly and chromosome  
528 disjunction during meiosis. *J. Cell Biol.* 193: 1213-1228.  
529
- 530 Buonomo, S. B., K. P. Rabitsch, J. Fuchs, S. Gruber, M. Sullivan *et al.*, 2003 Division of the  
531 nucleolus and its release of *CDC14* during anaphase of meiosis I depends on separase, *SPO12*,  
532 and *SLK19*. *Dev Cell* 4: 727-739.  
533
- 534 Campbell, I. W., X. Zhou, and A. Amon, 2019 The mitotic exit network integrates temporal and  
535 spatial signals by distributing regulation across multiple components. *eLife* 8: e41139.  
536
- 537 Chan, L.Y., and A. Amon, 2010 Spindle position is coordinated with cell-cycle progression  
538 through establishment of mitotic exit-activating and -inhibitory zones. *Mol. Cell* 39: 444–454.  
539
- 540 Cooper, K. F., M. J. Mallory, D. B. Egeland, M. Jarnik, and R. Strich, 2000 Ama1p is a meiosis-  
541 specific regulator of the anaphase promoting complex/cyclosome in yeast. *Proc. Natl. Acad. Sci.*  
542 *USA* 97: 14548–14553.  
543
- 544 D'Aquino, K. E., F. Monje-Casas, J. Paulson, V. Reiser, G. M. Charles *et al.*, 2005. The protein  
545 kinase Kin4 inhibits exit from mitosis in response to spindle position defects. *Mol. Cell* 19: 223–  
546 234.  
547
- 548 Davidow, L. S., L. Goetsch, and B. Byers, 1980 Preferential occurrence of nonsister spores in  
549 two-spored asci of *Saccharomyces cerevisiae*: evidence for regulation of spore-wall formation by  
550 the spindle pole body. *Genetics* 94: 581–595.  
551
- 552 Diamond, A. E., J. S. Park, I. Inoue, H. Tachikawa, and A. M. Neiman, 2009 The anaphase  
553 promoting complex targeting subunit Ama1 links meiotic exit to cytokinesis during sporulation  
554 in *Saccharomyces cerevisiae*. *Mol. Biol. Cell* 20: 134-145.  
555
- 556 Falk, J. E., I. W. Campbell, K. Joyce, J. Whalen, A. Seshan *et al.*, 2016 *LTE1* promotes exit from  
557 mitosis by multiple mechanisms. *Mol. Biol. Cell* 27:3991–4001.

558  
559 Friesen, H., R. Lutz, S. Doyle, and J. Segall, 1994 Mutation of the *SPS1*-encoded protein kinase  
560 of *Saccharomyces cerevisiae* leads to defects in transcription and morphology during spore  
561 formation. *Genes Dev.* 8: 2162–2175.  
562  
563 Gautier, T., T. Berges, D. Tollervey, and E. Hurt, 1997 Nucleolar KKE/D repeat proteins  
564 Nop56p and Nop58p interact with Nop1p and are required for ribosome biogenesis. *Mol. Cell*  
565 *Biol.* 17: 7088-7098.  
566  
567 Gordon, O., C. Taxis, P. J. Keller, A. Benjak, E. H. K. Stelzer *et al.*, 2006 Nud1p, the yeast  
568 homolog of Centriolin, regulates spindle pole body inheritance in meiosis. *EMBO J.* 25: 3856-  
569 3868.  
570  
571 Gruneberg, U., K. Campbell, C. Simpson, J. Grindlay, and E. Schiebel, 2000 Nud1p links astral  
572 microtubule organization and the control of exit from mitosis. *EMBO J.* 19: 6475-6488.  
573  
574 Guertin, D. A., L. Chang, F. Irshad, K. L. Gould, and D. McCollum, 2000 The role of the sid1p  
575 kinase and cdc14p in regulatin the onset of cytokinesis in fission yeast. *EMBO J.* 19: 1803-1815.  
576  
577 Hergovich, A., and B. A. Hemmings, 2012 Hippo signaling in the G2/M cell cycle phase: lessons  
578 learned from the yeast MEN and SIN pathways. *Semin. Cell Dev. Biol.* 23: 794-802.  
579  
580 Huang, L. S., H. K. Doherty, and I. Herskowitz, 2005 The Smk1p MAP kinase negatively  
581 regulates Gsc2p, a 1,3-beta-glucan synthase, during spore wall morphogenesis in *Saccharomyces*  
582 *cerevisiae*. *Proc. Natl. Acad. Sci. USA* 102: 12431-12436.  
583  
584 Iwamoto, M. A., S. R. Fairclough, S. A. Rudge, and J. Engebrecht, 2005 *Saccharomyces*  
585 *cerevisiae* Sps1p regulates trafficking of enzymes required for spore wall synthesis. *Eukaryot.*  
586 *Cell* 4:536–544.  
587  
588 Jaspersen, S. L., and D. O. Morgan, 2000 Cdc14 activates cdc15 to promote mitotic exit in  
589 budding yeast. *Curr. Biol.* 10: 615-518.  
590  
591 Jones, M. H., J. M. Keck, C. C. Wong, T. Xu, J. R. Yates 3<sup>rd</sup> *et al.*, 2011 Cell cycle  
592 phosphorylation of mitotic exit network (MEN) proteins. *Cell Cycle* 10: 3435-3440.  
593  
594 Juanes, M. A., and S. Piatti, 2016 The final cut: cell polarity meets cytokinesis at the bud neck in  
595 *S. cerevisiae* *Cell Mol. Life Sci.* 73: 3115-3136.  
596  
597 Kamieniecki, R. J., L. Liu, and D. S. Dawon, 2005 FEAR but not MEN genes are required for  
598 exit from meiosis I. *Cell Cycle* 4: 1093-1098.  
599  
600 Kane, S. M., and R. Roth, 1974 Carbohydrate metabolism during ascospore development in  
601 yeast. *J. Bacteriol.* 118: 8-14.  
602



- 603 Kinoshita, E., E. Kinoshita-Kikuta, K. Takiyama, and T. Koike, 2006 Phosphate-binding tag, a  
604 new tool to visualize phosphorylated proteins. *Mol. Cell. Proteomics* 5: 749–757.  
605
- 606 Knop, M., and K. Strasser, 2000. Role of the spindle pole body of yeast in mediating assembly of  
607 the prospore membrane during meiosis. *EMBO J.* 19: 3657-3667.  
608
- 609 Krishnamoorthy, T., X. Chen, J. Govin, W. L. Cheung, J. Dorsey *et al.*, 2006 Phosphorylation of  
610 histone H4 Ser1 regulates sporulation in yeast and is conserved in fly and mouse  
611 spermatogenesis. *Genes Dev.* 20: 2580–2592.  
612
- 613 Lam, C., E. Santore, E. Lavoie, L. Needleman, N. Fiacco *et al.*, 2014 A visual screen of protein  
614 localization during sporulation identifies new components of prospore membrane-associated  
615 complexes in budding yeast. *Eukaryot. Cell* 13: 383-391.  
616
- 617 Lee, B. H., and A. Amon, 2003 Role of Polo-like kinase *CDC5* in programming meiosis I  
618 chromosome segregation. *Science* 300: 482-486.  
619
- 620 Lee, S., W. A. Lim, and K. S. Thorn, 2013 Improved blue, green, and red fluorescent protein  
621 tagging vectors for *S. cerevisiae*. *PLoS One* 8: e67902.  
622
- 623 Longtine, M. S., A. McKenzie, D. J. Demarini, N. G. Shah, A. Wach *et al.*, 1998 Additional  
624 modules for versatile and economical PCR-based gene deletion and modification in  
625 *Saccharomyces cerevisiae*. *Yeast* 14: 953–961.  
626
- 627 Luca, F. C., M. Mody, C. Kurischko, D. M. Roof, T. H. Giddings, *et al.*, 2001 *Saccharomyces*  
628 *cerevisiae* Mob1p is required for cytokinesis and mitotic exit. *Mol. Cell Biol.* 21: 6972-6983.  
629
- 630 Maekawa, H., C. Priest, J. Lechner, G. Pereira, and E. Schiebel, 2007 The yeast centrosome  
631 translates the positional information of the anaphase spindle into a cell cycle signal. *J. Cell Biol.*  
632 179: 423–436.  
633
- 634 Mah, A. S., J. Jang, and R. J. Deshaies, 2001 Protein kinase Cdc15 activates the Dbf2-Mob1  
635 kinase complex. *Proc. Natl. Acad. Sci. USA* 98: 7325-7330.  
636
- 637 Maier, P., N. Rathfelder, M.G. Finkbeiner, C. Taxis, M. Mazza *et al.*, 2007 Cytokinesis in yeast  
638 meiosis depends on the regulated removal of Ssp1p from the prospore membrane. *EMBO J.* 26:  
639 1843-1852.  
640
- 641 Manzoni, R., F. Montani, C. Visintin, F. Caudron, A. Ciliberto *et al.*, 2010 Oscillations in Cdc14  
642 release and sequestration reveal a circuit underlying mitotic exit. *J. Cell Biol.* 190: 209-222.  
643
- 644 Marston, A. L., B. H. Lee, and A. Amon, 2003 The Cdc14 phosphatase and the FEAR network  
645 control meiotic spindle disassembly and chromosome segregation. *Dev. Cell* 4: 711-726.  
646
- 647 Meitinger, F., M. E. Boehm, A. Hofmann, B. Hub, H. Zentgraf *et al.*, 2011 Phosphorylation-  
648 dependent regulation of the F-BAR protein Hof1 during cytokinesis. *Genes Dev.* 25: 875-888.



- 649  
650 Mohl, D. A., M. J. Huddleston, T. S. Collingwood, R. S. Annan, and R. J. Deshaies, 2009 Dbf2-  
651 Mob1 drives relocalization of protein phosphatase Cdc14 to the cytoplasm during exit from  
652 mitosis. *J. Cell Biol.* 184: 527-539.  
653  
654 Moreno-Borchart, A. C., K. Strasser, M. G. Finkbeiner, A. Shevchenko, A. Shevchenko *et al.*,  
655 2001 Prospore membrane formation linked to the leading edge protein (LEP) coat assembly.  
656 *EMBO J.* 20: 6946-6957.  
657  
658 Nakanishi, H., P. de los Santos, and A. M. Neiman, 2004 Positive and negative regulation of a  
659 SNARE protein by control of intracellular localization. *Mol. Biol. Cell* 15: 1802–1815.  
660  
661 Neiman, A.M., L. Katz, and P. J Brenwald, 2000 Identification of Domains Required for  
662 Developmentally Regulated SNARE Function in *Saccharomyces cerevisiae*. *Genetics* 155: 1643-  
663 1655.  
664  
665 Neiman, A. M., 2011 Sporulation in the budding yeast *Saccharomyces cerevisiae*. *Genetics* 189:  
666 737-765.  
667  
668 Nickas, M. E., A. E. Diamond, M.-J. Yang, and A. M. Neiman, 2004 Regulation of spindle pole  
669 function by an intermediary metabolite. *Mol. Biol. Cell* 15: 2606–2616.  
670  
671 Oh, Y., K. J. Chang, P. Orlean, C. Wloka, R. Deshaies *et al.*, 2012 Mitotic exit kinase Dbf2  
672 directly phosphorylates chitin synthase Chs2 to regulate cytokinesis in budding yeast. *Mol. Biol.*  
673 *Cell* 23: 2445-2456.  
674  
675 Pablo-Hernando, M. E., Y. Arnaiz-Pita, H. Nakanishi, D. Dawson, F. del Rey, *et al.*, 2007  
676 Cdcc15 is required for spore morphogenesis independently of Cdc14 in *Saccharomyces*  
677 *cerevisiae*. *Genetics* 177: 281-293.  
678  
679 Paulissen, S.M., C.J. Slubowski, J.M. Roesner, and L.S. Huang, 2016 Timely Closure of the  
680 Prospore Membrane Requires *SPS1* and *SPO77* in *Saccharomyces cerevisiae*. *Genetics* 204:  
681 1203-1216.  
682  
683 Pereira, G., and E Schiebel, 2005 Kin4 kinase delays mitotic exit in response to spindle  
684 alignment defects. *Mol. Cell* 19: 209–221.  
685  
686 Philips, J., and I. Herskowitz, 1998 Identification of Kellp, a Kelch domain-containing protein  
687 involved in cell fusion and morphology in *Saccharomyces cerevisiae*. *J. Cell Biol.* 143: 375–398.  
688  
689 Poon, C. L. C., W. Liu, Y. Song, M. Gomez, Y. Kulaberoglu *et al.*, 2018 A Hippo-like Signaling  
690 Pathway Controls Tracheal Morphogenesis in *Drosophila melanogaster*. *Dev Cell* 47: 564-575.  
691  
692 Rabitsch, K.P., A. Toth, M. Galova, A. Schleiffer, G. Schaffner *et al.*, 2001 A screen for genes  
693 required for meiosis and spore formation based on whole-genome expression. *Curr Biol.* 11:  
694 1001-1009.

695  
696 Renicke, C., A.-K. Allman, A. P. Lutz, T. Heimerl, and C. Taxis, 2017 The Mitotic Exit Network  
697 regulates spindle pole body selection during sporulation of *Saccharomyces cerevisiae*. *Genetics*  
698 206: 919-937.  
699  
700 Rock, J. M., and A. Amon, 2011 Cdc15 integrates Tem1 GTPase-mediated spatial signals with  
701 Polo kinase-mediated temporal cues to activate mitotic exit. *Genes Dev.* 25: 1943-1954.  
702  
703 Rock, J. M., D. Lim, L. Stach, R. W. Ogradowicz, J. M. Keck *et al.*, 2013 Activation of the yeast  
704 Hippo pathway by phosphorylation-dependent assembly of signaling complexes. *Science* 340:  
705 871-875.  
706  
707 Rose, M. D., and G. R. Fink, 1990 *Methods in Yeast Genetics*, Cold Spring Harbor, NY: Cold  
708 Spring Harbor Laboratory Press.  
709  
710 Schindelin, J., I. Arganda-Carreras, E. Frise, V. Kaynig, M. Longair *et al.*, 2012 Fiji: an open-  
711 source platform for biological-image analysis. *Nat Methods* 9: 676-82.  
712  
713 Schneider, C. A., W. S. Rasband, and K.W. Eliceiri, 2012 NIH Image to ImageJ: 25 years of  
714 image analysis. *Nat Methods* 9: 671-675.  
715  
716 Schweitzer, B., and P. Philippsen, 1991 *CDC15*, an essential cell cycle gene in *Saccharomyces*  
717 *cerevisiae*, encodes a protein kinase domain. *Yeast* 7: 265-273.  
718  
719 Shou, W., J. H. Seol, A. Shevchenko, C. Baskerville, D. Moazed *et al.*, 1999 Exit from mitosis is  
720 triggered by Tem1-dependent release of the protein phosphatase Cdc14 from nucleolar RENT  
721 complex. *Cell* 97: 233-244.  
722  
723 Slubowski, C.J., A.D. Funk, J.M. Roesner, S.M. Paulissen, and L.S. Huang, 2015 Plasmids for  
724 C-terminal tagging in *Saccharomyces cerevisiae* that contain improved GFP proteins, Envy and  
725 Ivy. *Yeast* 32: 379-387.  
726  
727 Slubowski, C.J., S.M. Paulissen, and L.S. Huang, 2014 The GCKIII kinase Sps1 and the 14-3-3  
728 isoforms, Bmh1 and Bmh2, cooperate to ensure proper sporulation in *Saccharomyces cerevisiae*.  
729 *PLoS One* 9: e113528.  
730  
731 Stegmeier, F., and A. Amon, 2004 Closing mitosis: the functions of the Cdc14 phosphatase and  
732 its regulation. *Annu. Rev. Genet.* 38: 203–232.  
733  
734 Taxis, C., P. Keller, Z. Kavagiou, L. J. Jensen, J. Colombelli *et al.*, 2005 Spore number control  
735 and breeding in *Saccharomyces cerevisiae*: a key role for a self-organizing system. *J. Cell Biol.*  
736 171: 627-640.  
737  
738 Visintin, R., K. Craig, E.S. Hwang, S. Prinz, M. Tyers *et al.*, 1998 The phosphatase Cdc14  
739 triggers mitotic exit by reversal of Cdk-dependent phosphorylation. *Mol. Cell* 2: 709-718.  
740

- 741 Visintin R., and A. Amon, 2001 Regulation of the mitotic exit protein kinases Cdc15 and Dbf2.  
742 Mol. Biol. Cell 12: 2961–2974.  
743
- 744 Weiss, E. L., 2012 Mitotic exit and separation of mother and daughter cells. Genetics 192: 1165-  
745 1202.  
746
- 747 Whinston, E., G. Omerza, A. Singh, C. W. Tio, and E. Winter, 2013 Activation of the Smk1  
748 mitogen-activated protein kinase by developmentally regulated autophosphorylation. Mol. Cell.  
749 Biol. 33: 688–700.  
750

751 **Figure Legends.**

752 **Figure 1.** *CDC15* is required for *SPS1* phosphorylation. (A) Screening for other genes deficient  
753 in Histone phosphorylation. Cells lacking specific genes were induced to sporulated and  
754 collected at 8 hours after induction of sporulation. H4S1 phosphorylation was assayed by  
755 immunoblotting. Pgk1 was used as a loading control and was from the top half of the same gel as  
756 that probed for histone phosphorylation. Protein marker sizes shown to the left of gel. Wild type  
757 (WT (LH902)), *sps1* (LH966), *cdc15* (LH1066), *spo77* (LH1010), *sps1 cdc15* (LH1067), *mob1*  
758 *dbf2 dbf20* (LH1068), *ama1* (LH1014). (B) Sps1-13myc was assayed on an SDS-PAGE gel  
759 using lysates from WT (LH875)) and *cdc15-mn* (LH1069) cells that were collected at the  
760 indicated times after induction of sporulation and probed with an anti-myc antibody. (C) Sps1-  
761 13myc was assayed using a Phos-tag gel using lysates from the same samples collected for (B).  
762 (D) Cdc15 and Sps1 form a complex. Immunoprecipitation experiments were carried out using  
763 lysates from WT (LH902), *Cdc15-myc* (LH1070), *sfGFP-Sps1* (LH986), *Cdc15-myc sfGFP-Sps1*  
764 (LH1071). Sps1 was immunoprecipitated (IP) using GFP-Trap beads. Immunoblots (IB) were  
765 probed with either anti-GFP antibody or anti-myc antibody.

766

767 **Figure 2.** *CDC15* is required for proper prospore membrane development. Prospore membranes  
768 are labelled in green using the plasmid pRS426-G20 (WT (LH917) and *sps1*Δ (LH1047) or  
769 pRS426-E20 (*cdc15-mn* (LH1073), *sps1*Δ *cdc15-mn* (LH1074). Histones are labeled in red using  
770 genomically integrated *HTB2-mCherry* fusion protein. Developmental stages are shown from  
771 early (left) to late (right). Pink arrowheads point to examples of hyperelongated prospore  
772 membranes. Yellow arrowheads point to examples of rounded prospore membranes. Images  
773 were captured using a wide-field microscope.

774

775 **Figure 3.** *CDC15* and *SPS1* are required for timely prospore membrane closure and act in  
776 parallel to *AMA1*. Quantitation of prospore membrane (PSM) closure (A) and initiation (B) in  
777 WT (LH917), *cdc15-mn* (LH1072), *sps1Δ* (LH1047) *cdc15-mn ama1Δ* (LH1075). At least 100  
778 cells were counted per timepoint, for each genotype. Prospore membranes were visualized using  
779 the plasmid pRS426-G20 for the WT and *sps1Δ* strains and pRS426-E20 for the *cdc15-mn* and  
780 *ama1Δ cdc15-mn* strains. (C) *cdc15-mn ama1Δ*(LH1076) mutants produce hyperelongated  
781 prospore membranes that do not close. Prospore membranes are labelled in green using the  
782 plasmid pRS426-E20. Prospore membranes are shown from early (left) to late (right) on the  
783 bottom row, with a corresponding DIC picture of the cell on top. Pink arrowheads point to  
784 examples of hyperelongated prospore membranes. Yellow arrowheads point to examples of  
785 rounded prospore membranes. Images were captured using a wide-field microscope.

786

787 **Figure 4.** *SPS1* has a spindle disassembly defect. Microtubules were visualized in green using an  
788 anti-Tub1 antibody. Histones, in red, are visualized using *HTB2-mCherry*. Cells at different time  
789 points in meiosis, arrayed from early (left) to late (right), with varying terminal phenotypes  
790 shown for the mutant strains. Cells were fixed at appropriate times during sporulation and  
791 stained with anti-Tub1 antibodies. Images were captured using a wide-field microscope. Cells  
792 are of the following genotypes: (A) WT (LH902) (B) *cdc15-mn* (LH1072) (C) *sps1Δ* (LH976)  
793 (D) *cdc15-mn sps1Δ* (LH1067).

794

795 **Figure 5.** The sustained release of Cdc14 requires *SPS1* and *CDC15* but not *DBF2 DBF20*  
796 *MOB1*. (A) The Cdc14-GFP<sub>Envy</sub> fusion protein was visualized in WT (LH1077), *sps1Δ*

797 (LH1078), *cdc15-mn* (LH1079) and *mob1-mn dbf2-mn dbf20Δ* (LH1080) cells. Representative  
798 images are shown from these strains. Histones are visualized using a genomically integrated  
799 *Htb2-mCherry*. Images were captured using a confocal microscope. White arrowhead points to  
800 nucleolar-localized Cdc14. Scale bar = 2 μm. (B) Quantitation of cells in anaphase II (as  
801 determined by *Htb2-mCherry* localization) with Cdc14 released from the nucleolus. Cells were  
802 sporulated in triplicate, with 100 anaphase II cells counted for each biological replicate for a total  
803 of 300 cells per strain. Error bars represent standard error of the mean. The wild type and triple  
804 mutant (*mob1-mn dbf2-mn dbf20Δ*) strains are significantly different from the *cdc15-mn* and the  
805 *sps1Δ* strains, but not from one another (one-way ANOVA [F(3,8)=860, p<0.001], followed by  
806 Tukey HSD post hoc test (alpha = 0.01)).

807

808 **Figure 6.** *SPS1* and *CDC15* are not required to regulate the number of prospore membranes  
809 formed. The number of prospore membranes formed per cell were counted in anaphase II cells,  
810 as assayed by visualizing histones using *Htb2-mCherry*. Prospore membranes were visualized  
811 using the plasmid pRS426-E20. WT (LH1081), *sps1Δ* (LH1089), *cdc15-mn* (LH1073), *mob1-mn*  
812 *dbf2-mn dbf20Δ* (LH1082). Three biological replicates of 100 cells per replicate were counted,  
813 for a total of 300 cells per strain. Error bars represent standard error of the mean. The *wild type*,  
814 *cdc15-mn* and *sps1Δ* strains are significantly different from the triple mutant (*mob1-mn dbf2-mn*  
815 *dbf20Δ*) strain, but not from one another, using 4 PSMs as the variable for comparison (one-way  
816 ANOVA [F(3,8) = 437, p<0.001], followed by Tukey HSD post hoc test (alpha = 0.01)).

817

818 **Figure 7.** *DBF2 DBF20 MOB1* are not required for timely prospore membrane closure. (A)  
819 *mob1-mn dbf2-mn dbf20Δ* do not form hyperelongated prospore membranes (PSMs). Prospore

820 membranes are labelled in green using the plasmid pRS426-E20. Histones are visualized using  
821 *HTB2-mCherry*. Scale bar = 2 $\mu$ m. *mob1-mn dbf2-mn dbf20 $\Delta$*  cells close (B) and initiate (C)  
822 prospore membranes with timing similar to wild type cells. Prospore membrane closure and  
823 initiation were counted as in Figure 3A and B, with at least 200 cells counted per timepoint for  
824 each genotype. WT (LH1081), *mob1-mn dbf2-mn dbf20 $\Delta$*  (LH1082), *sps1 $\Delta$*  (LH1089), and  
825 *cdc15-mn* (LH1073); the pRS426-E20 plasmid was transformed into these strains for  
826 visualization of the prospore membrane.

827

828 **Figure 8.** *DBF2 DBF20 MOB1* are not required for spindle disassembly. (A) Spindles, as seen in  
829 wild type (LH902) and *mob1-mn dbf2-mn dbf20 $\Delta$*  (LH1068) cells. Cells were fixed and stained.  
830 Microtubules were visualized in green using an anti-Tub1 antibody. Histones, in red, are  
831 visualized using *HTB2-mCherry*. Nuclei were visualized using *HTB2-mCherry*. (B) Model  
832 depicting the relationship between mitotic exit members in mitosis and meiosis. See discussion  
833 in [text](#).

Figure 1

**A**

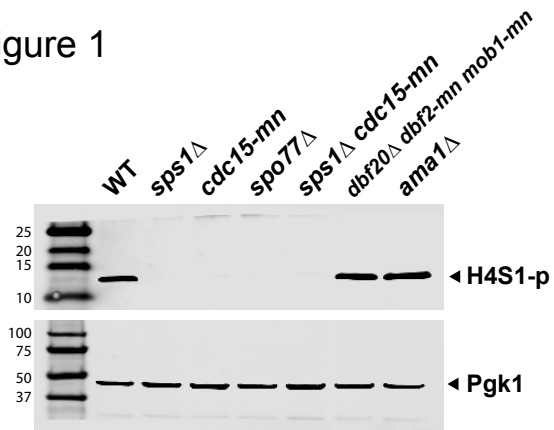

**B**

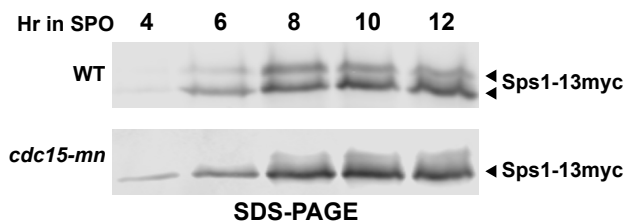

**C**

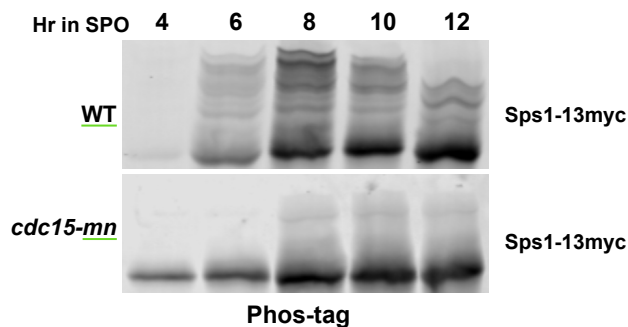

**D**

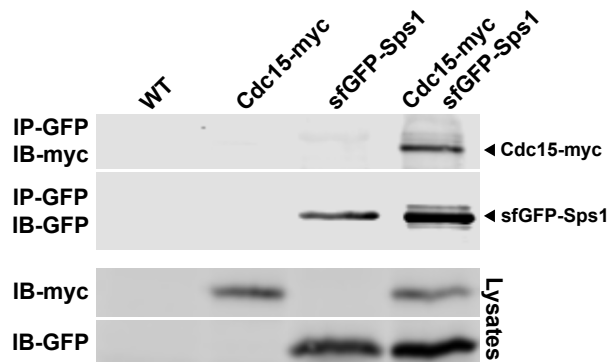



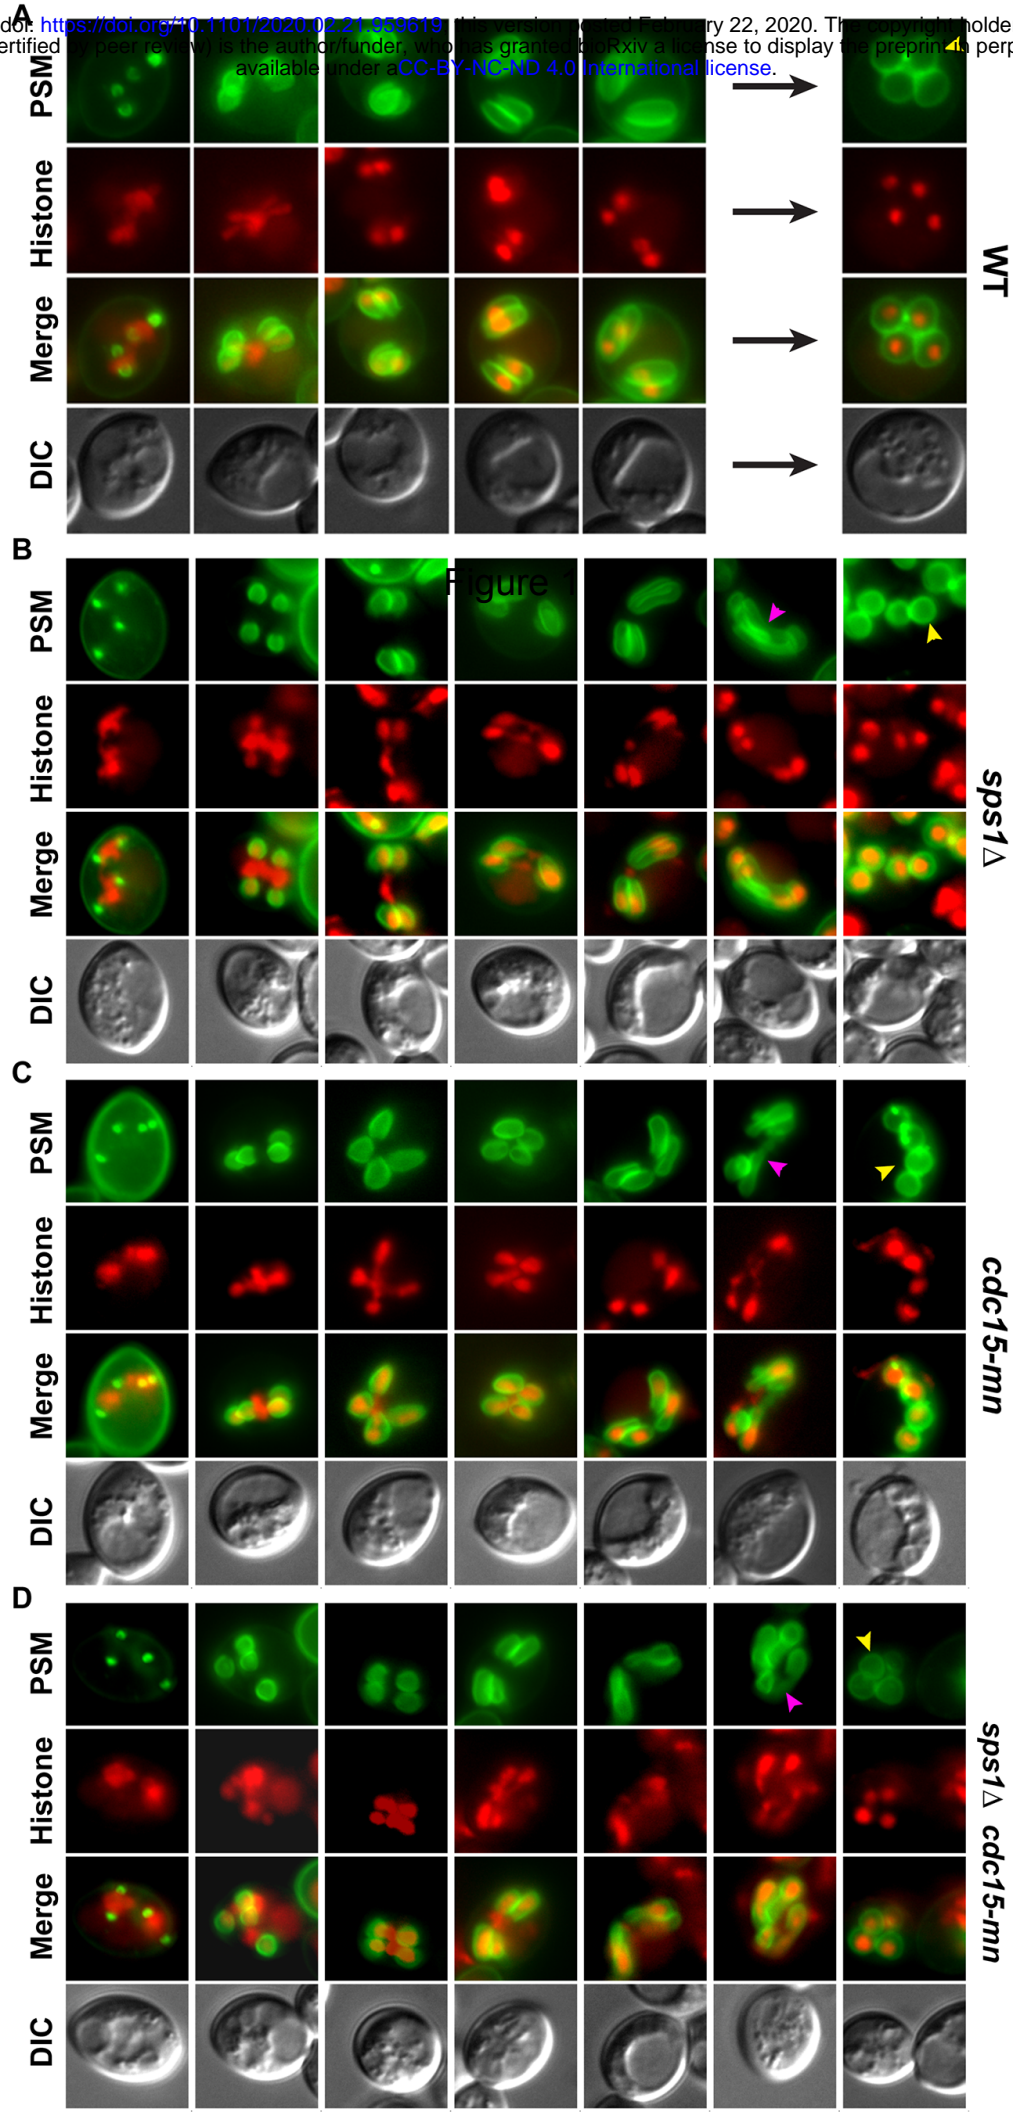

Figure 3

**A**

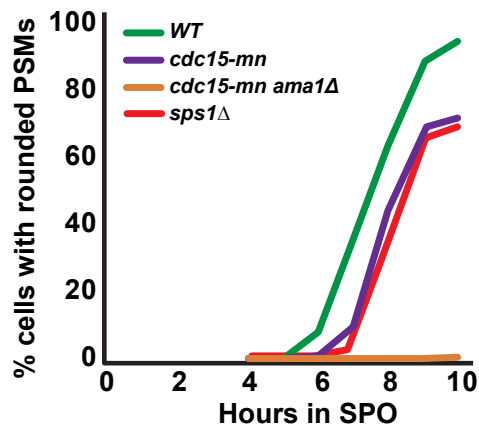

**B**

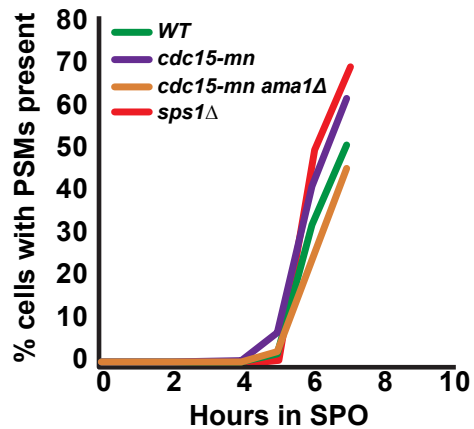

**C**

*ama1Δ cdc15-mn*

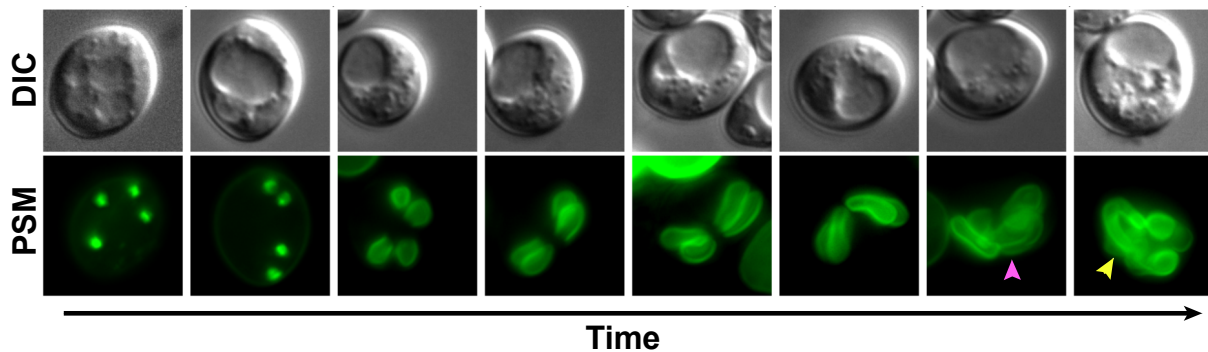

# Figure 4

*wild type*

**B**

*cdc15-mn*

**A**

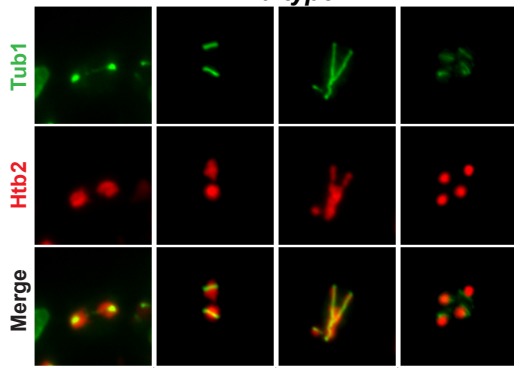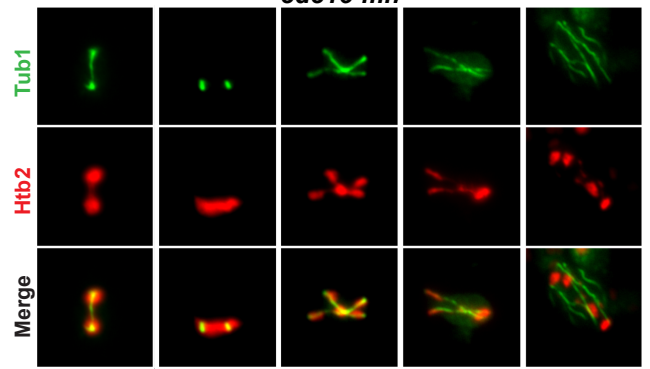

**C**

*sps1* $\Delta$

**D**

*cdc15-mn sps1* $\Delta$

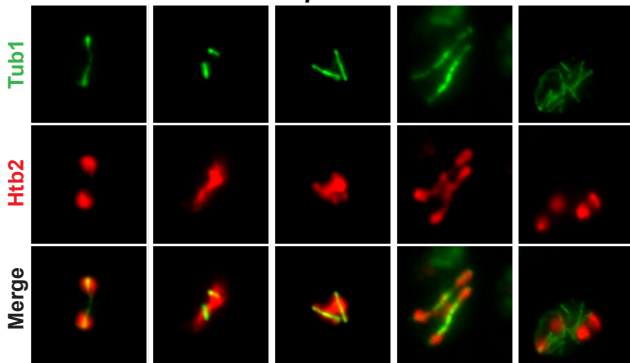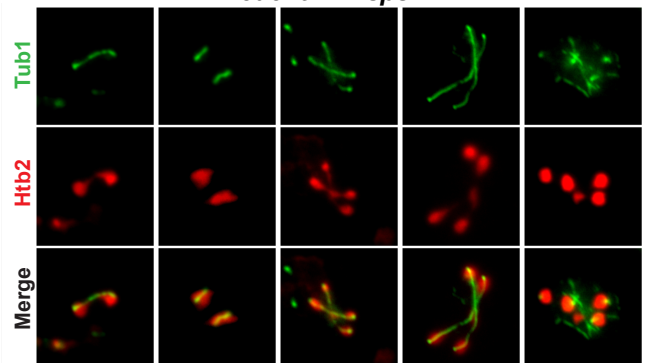

# Figure 5

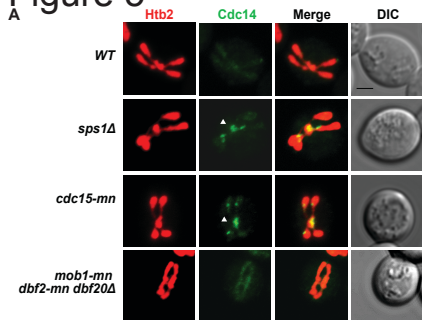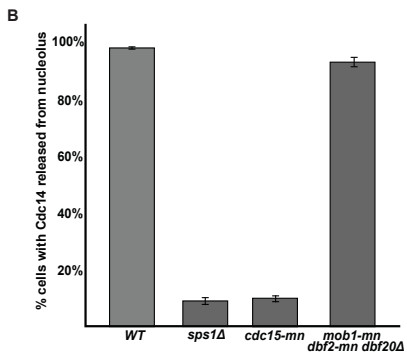

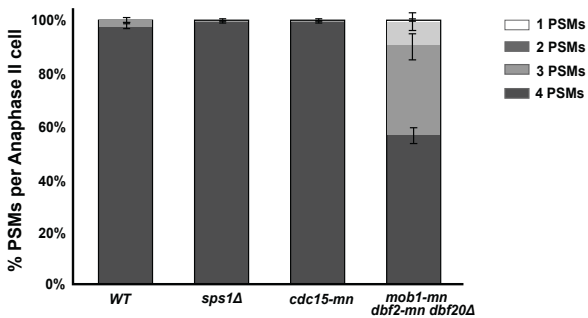

Figure 6

Figure 7

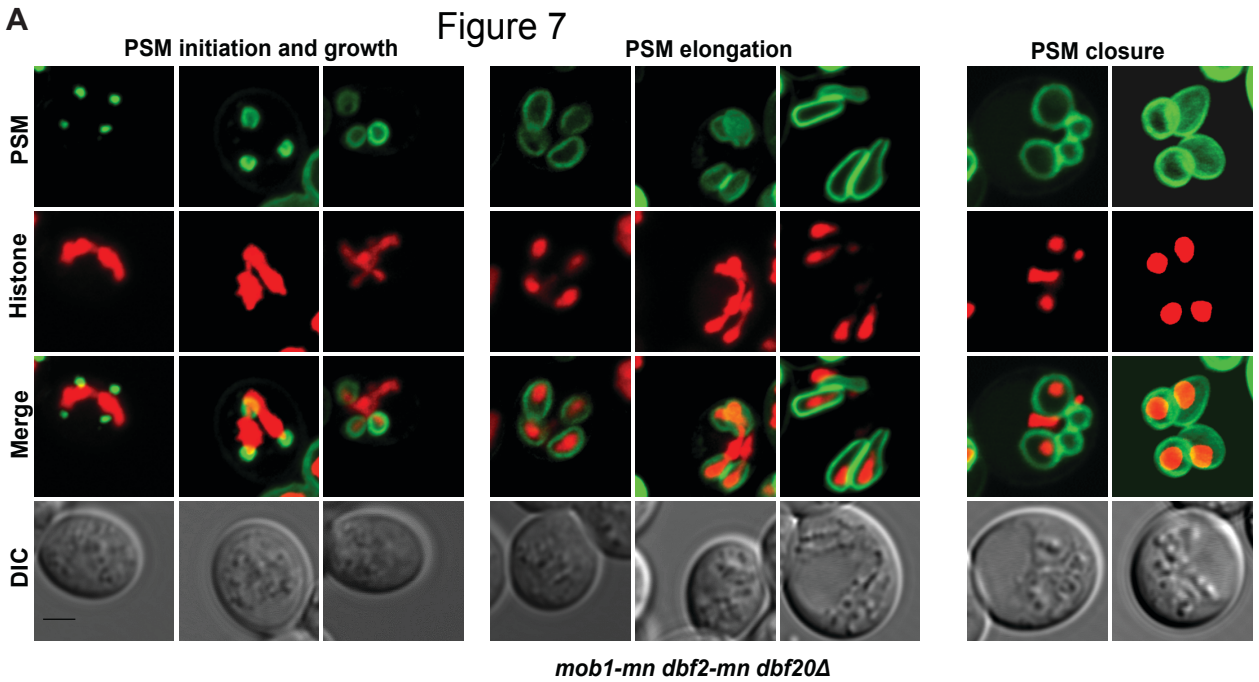

**B**

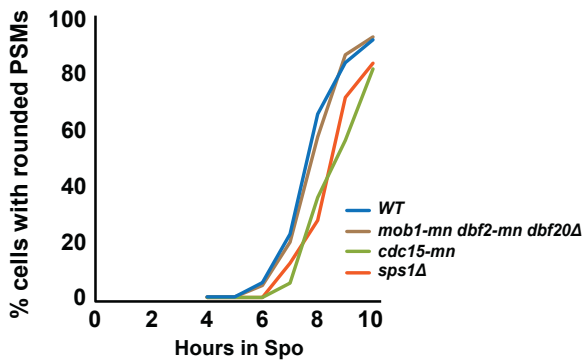

**C**

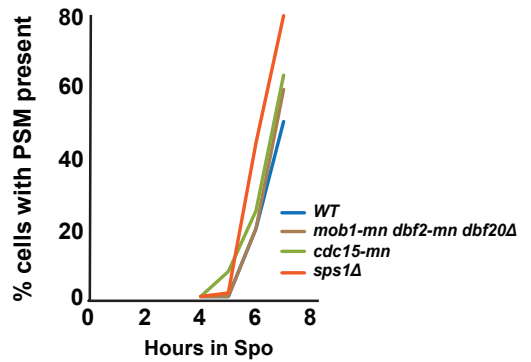

# Figure 8

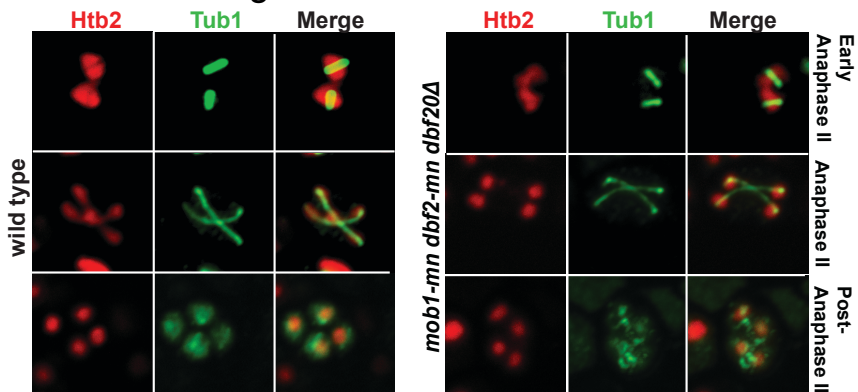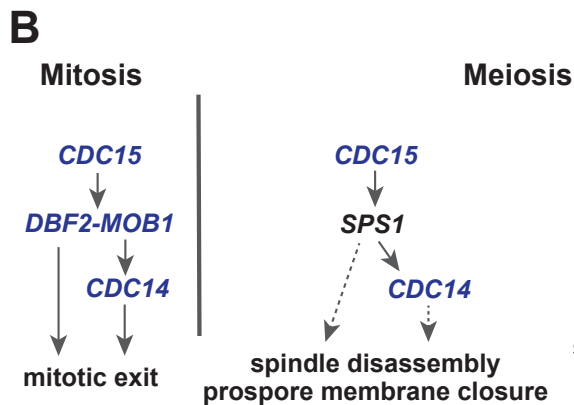

Source: https://www.biorxiv.org/content/10.1101/2020.02.21.959619v1.full.pdf
